# Supplementary material
Source: Springer Nature journal article supplement (https://www.springermedizin.de/resource/supplementary/12885_2011_3860_MOESM2_ESM.pdf/9464562)

**A**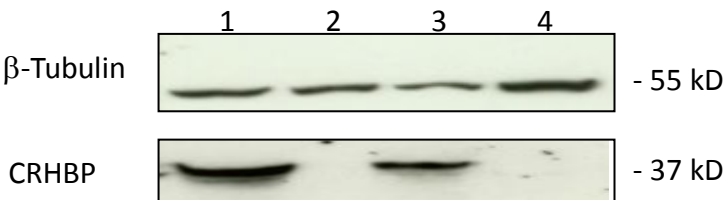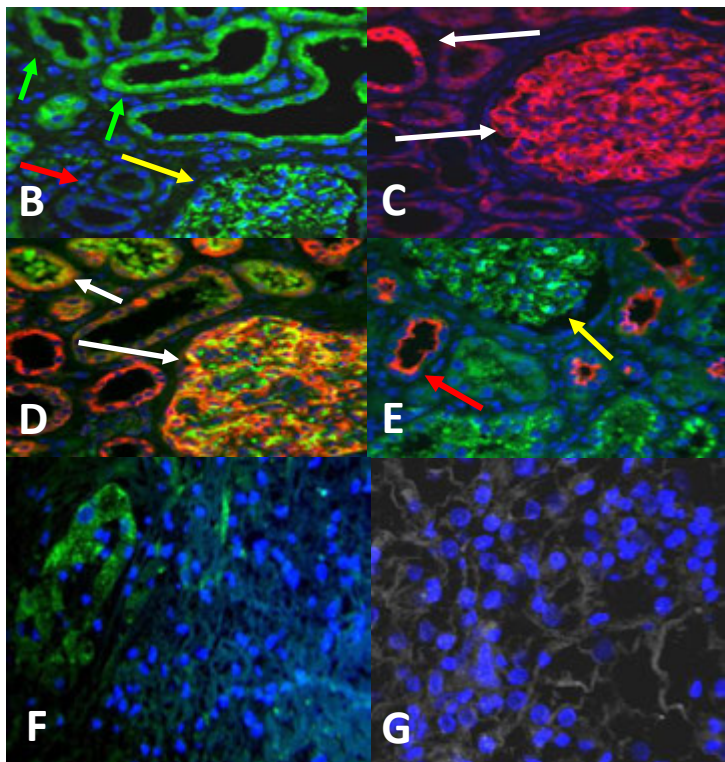

Supplement: MOESM2 [file 9464562]
